# Supplementary material
Source: PubMed Central journal article supplement (PMC2777511)

**Supplementary Figure 1.** Tregs from LAD-1 patients fail to modulate the expression of CD80/86 on human LPS-stimulated B cells. Flow cytometric analysis of CD80/CD86 expression on human CD19<sup>+</sup> B cells at 0 h (shaded histogram) and after 36 h of stimulation with 1 µg/ml LPS alone (opened histogram) or with pre-activated human (dashed histogram) hCD25<sup>hi</sup> from healthy donors (D1/D2) or from LAD-1 patients (LAD1 P1/P2).

**Supplementary Figure 2.** Phenotype and frequency of Tregs in LAD-1 patients. Flow cytometric analysis of CD4<sup>+</sup> T cells in peripheral blood of healthy donor (HD) and LAD-1 patients (P1/P2). The cells were surface stained with CD25, CD127 or CD18 and intracellular stained with FOXP3 (clone 236A/E7) and CD152. Percentage is based on CD4 gating.

**Supplementary Figure 3.** Suppressive functions of human and mouse Tregs in the presence and absence of APCs. *In vitro* suppression of CD4<sup>+</sup>CD25<sup>-</sup> T cells from BALB/c mice with FACS-sorted human hCD25<sup>hi</sup> or mouse mCD25<sup>+</sup> Tregs stimulated for 3 days with *A*, soluble anti-mCD3 and mouse T-depleted splenocytes or *B*, with anti-mCD3/CD28 conjugated Dynabeads at 10:1 cell to bead ratio. The fresh human Tregs were activated under optimal conditions with plate-bound anti-hCD3 (5 µg/ml) and anti-hCD28 (2.5 µg/ml). Data are representative of three independent experiments.



# Supplementary Figure 1

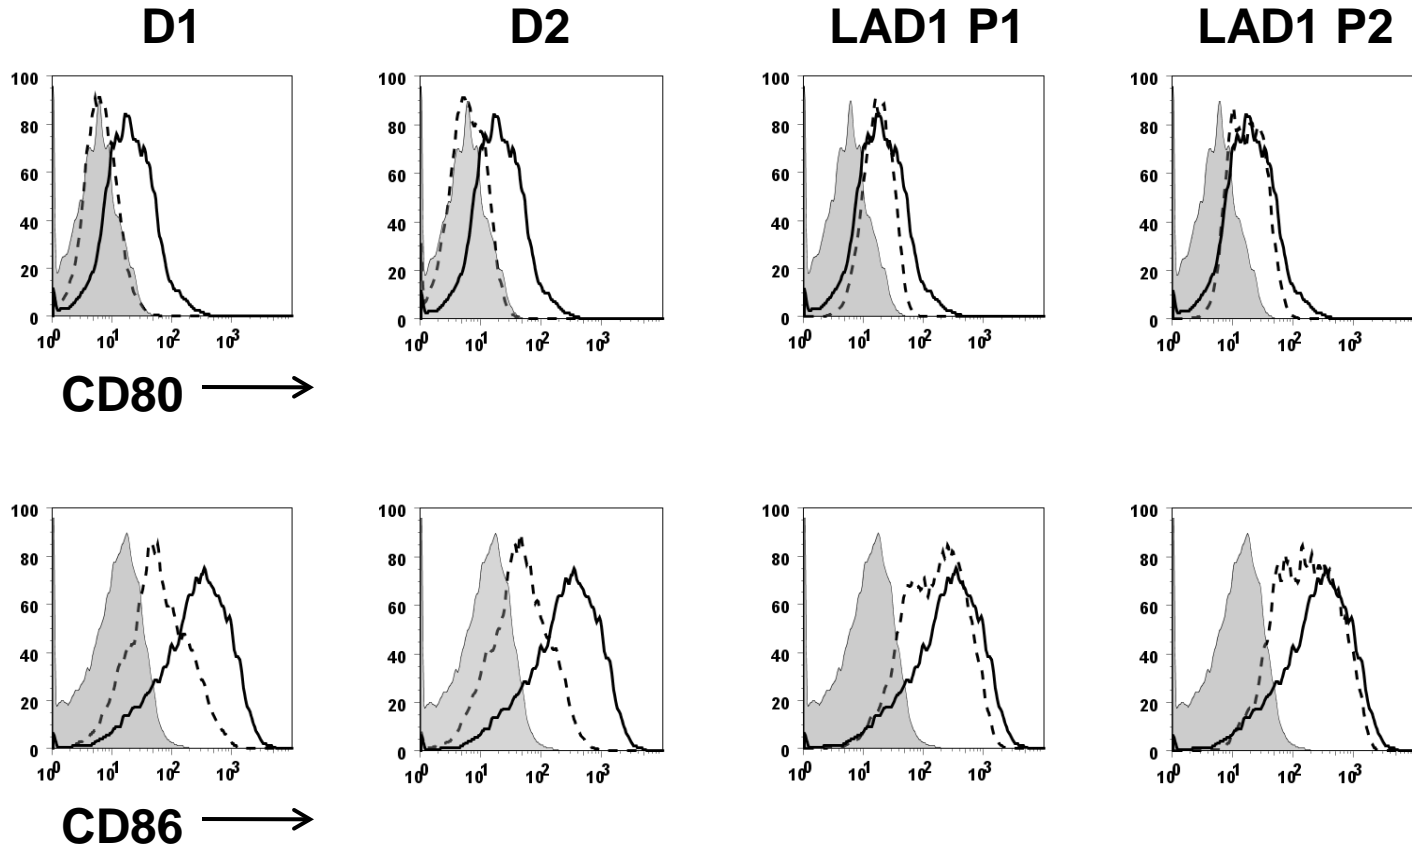

# Supplementary Figure 2

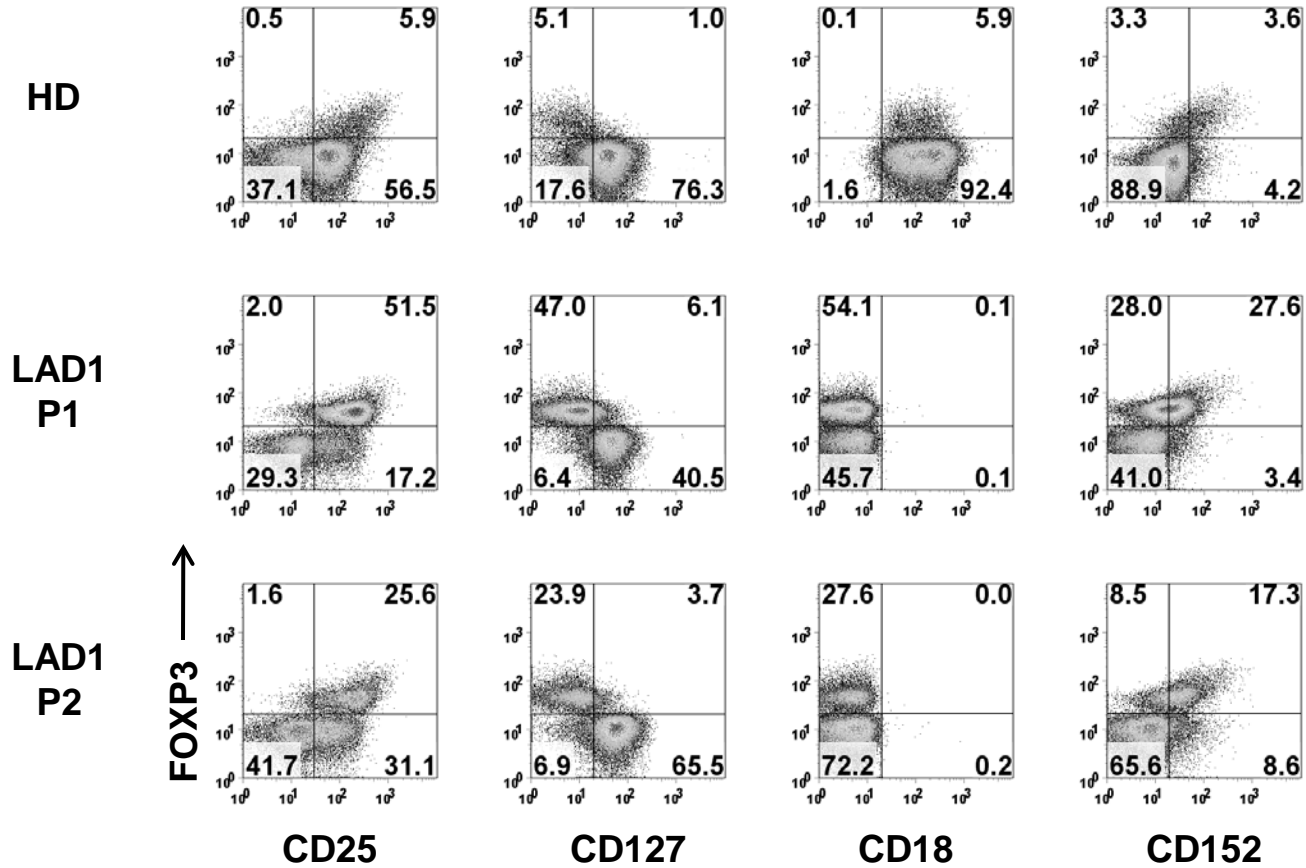

# Supplementary Figure 3

## A

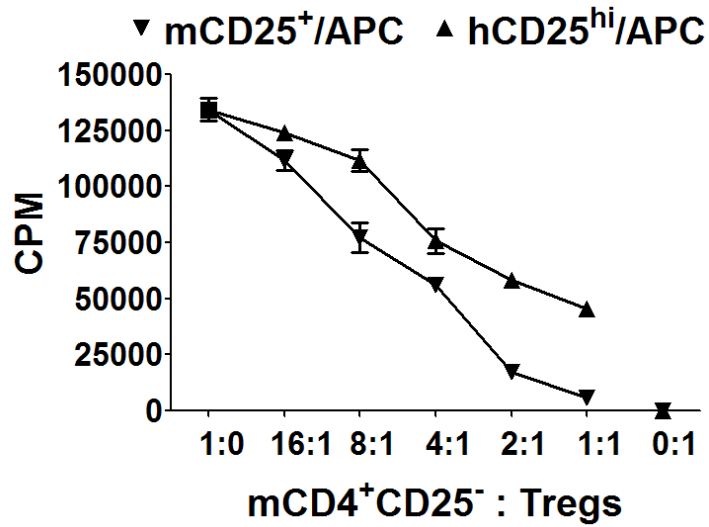

## B

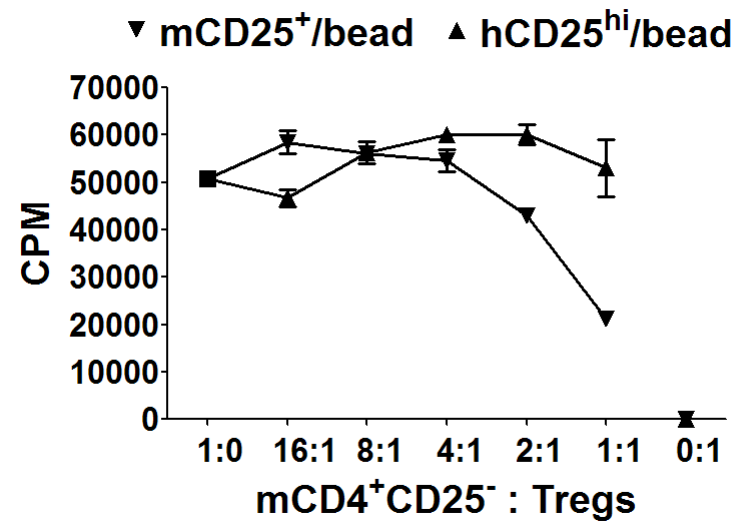

# Supplementary Figure 1



# Supplementary Figure 2



# Supplementary Figure 3

## A



## B



Supplement: NIHMS157176-supplement-supplement_1.pdf [file NIHMS157176-supplement-supplement_1.pdf]
